# Supplementary material for: Active and passive modulation of solar light transmittance in a hybrid thermochromic soft-matter system for energy-saving smart window applications
Source: Royal Society of Chemistry journal article supplement (doi:10.1039/c8tc01274a), 2018-01-01
Supplement: c8tc01274a1.pdf [file c8tc01274a1.pdf]

Copyright WILEY-VCH Verlag GmbH & Co. KGaA, 69469 Weinheim, Germany, 2016.

## Supporting Information

### Active and Passive Modulation of Solar Light Transmittance in a Hybrid Thermochromic Soft-Matter System for Energy-Saving Smart Windows Applications

Xiao Liang, Mei Chen, Qian Wang, Shumeng Guo, Lanying Zhang and Huai Yang\*

#### Abbreviations List

solar modulation ----  $\Delta T_{\text{sol}}$

chiral nematic ----  $N^*$

modulation contrast ---- MC

phase transition ---- PT

luminous transmission ----  $T_{\text{lum}}$

polymeric acrylate liquid crystals ---- PALCs

transmission electron microscope ---- TEM

X-ray photoelectron spectroscopy ---- XPS

energy-dispersive X-ray ---- EDX

polyethylene glycol diacrylate ---- PEGDA-600

hydroxypropyl methacrylate ---- HPMA

sematic A ---- SmA

tungsten doped vanadium dioxide ----  $W\text{-VO}_2$

liquid crystals ---- LCs

homeotropically aligned fibres ---- HAFs

Isotropic polymeric acrylate monomers ---- IPAMs

liquid crystals with a phase change behaviour ---- PC-LCs

X-ray diffraction ---- XRD

scanning electron microscopy ---- SEM

polarized optical microscope ---- POM

lauryl methacrylate ---- LMA

polyvinyl pyrrolidone ---- PVP

**(1) Chemical structures of monomers:**

HPMA: CC(C)=COC(=O)OCC(C)C

LMA: CCCCCCCCCCCCCCCCCCOC(=O)C=C

PEGDA600: C=COC(=O)OCC(OCCOC(=O)C=C)n

Bis-EMA15: C=COC(=O)OCC(OCCOC(=O)C=C)c1ccc(cc1)-c2ccc(cc2)Oc3ccccc3OC(=O)C=C

**(2) Polymeric Acrylate Liquid Crystals (PALCs):**

C6M: C=COC(=O)OCCCCCOc1ccc(cc1)Oc2ccc(cc2)OC(=O)C=C

**(3) Photo-initiator:**

651: COc1ccc(cc1)C(=O)C(c2ccccc2)(OC)c3ccccc3

**(4) Composition of the SmA-LCs Monomers:**

Two monomers are shown, each consisting of a long alkyl chain attached to a biphenyl core with a cyano group (-CN).

**(5) Composition of the N\*-LCs Monomers:**

Four monomers are shown, each consisting of a long alkyl chain attached to a biphenyl core with a cyano group (-CN). The structures vary in the length of the alkyl chain and the presence of a methoxy group.

**(6) Composition of the PC-LCs:**

SmA-LCs : N\*-LCs = 23 : 77 wt.%

**Scheme S1.** Chemicals structures and physical parameters of some of the materials used.

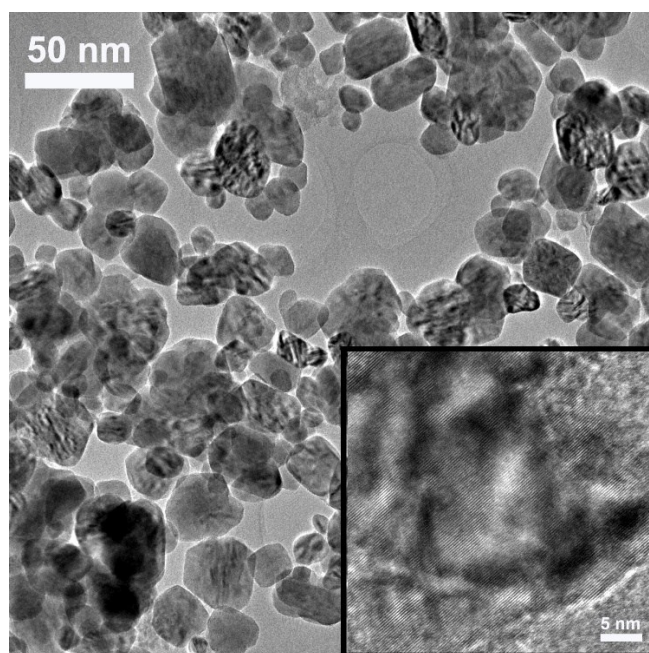

**Figure S1.** TEM photographs of the as-made W-VO<sub>2</sub> NCs synthesized from a thermolysis method (Insert image: HRTEM of the as made W-VO<sub>2</sub> NCs).

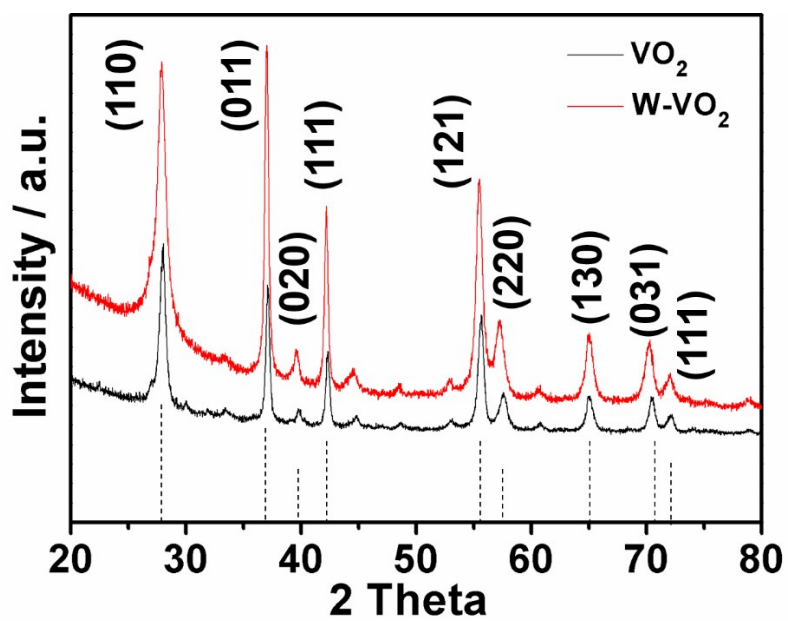

**Figure S2.** XRD pattern of the as-made VO<sub>2</sub> NCs (black) and W-VO<sub>2</sub> NCs (red), respectively.

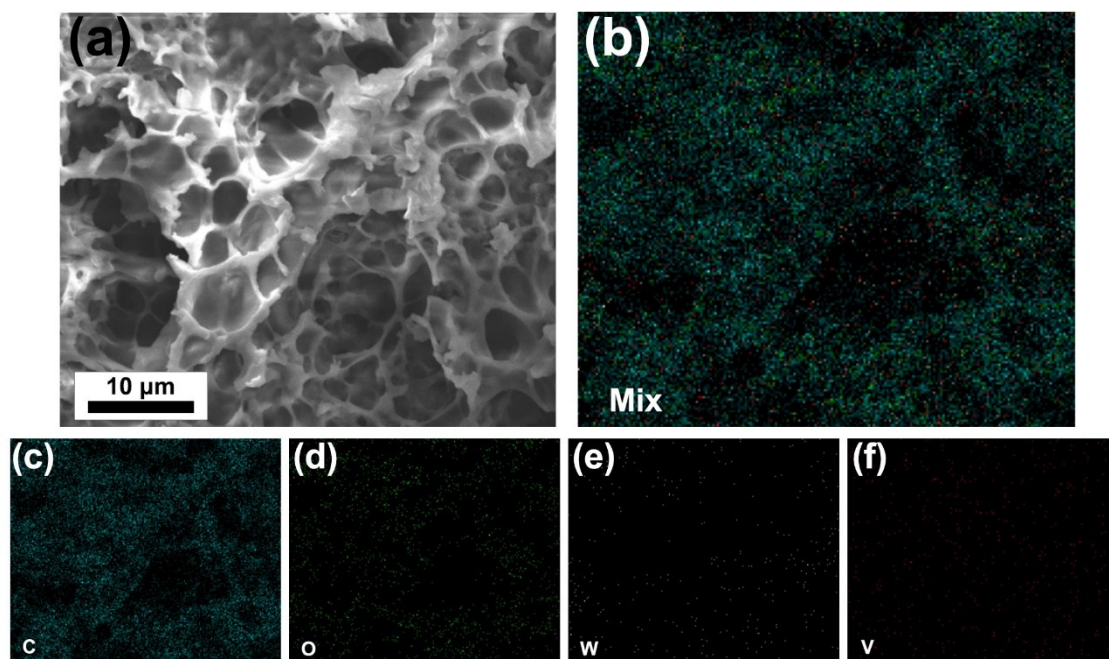

**Figure S3.** (a) SEM image of the polymer morphology of the as-made hybrid material from an overhead view. (b-f) The corresponding EDS mapping results of the as-made material in the SEM image.

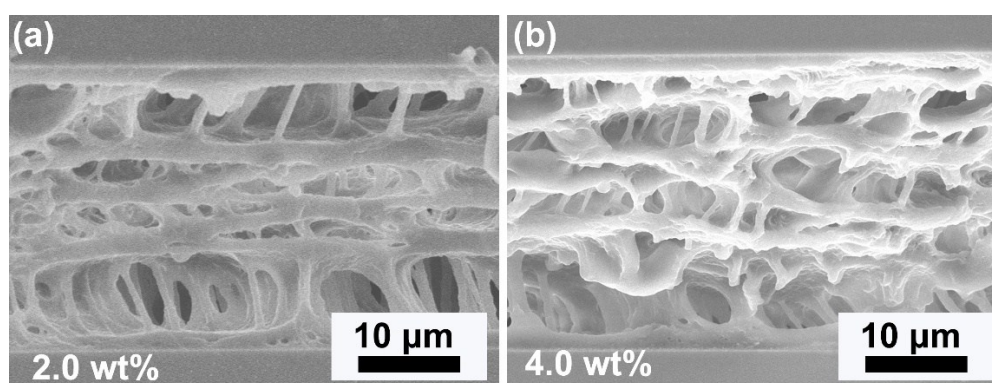

**Figure S4.** Corss-sectional SEM images of the as-made hybrid device containing (a) 2.0 wt% and (b) 4.0 wt% W-VO<sub>2</sub> NCs, respectively.
